## CORRECTION

### Nitrogen monoxide inhibits haem synthesis in mouse reticulocytes

M. R. MIKHAEL, S. SOE-LIN, S. APTE and P. PONKA

**Volume 451 (2013), pp. 61–67**

The authors of the above paper omitted to include Dr Tariq Roshan as second author. Dr Roshan contributed to the work reported by helping with the preparation of mouse reticulocytes.
